# Supplementary material for: Development and validation of a cardiovascular risk prediction model in type 1 diabetes
Source: PubMed Central journal article supplement (PMC8382639; doi:10.1007/s00125-021-05478-4), 2021-06-09
Supplement: 125_2021_5478_MOESM1_ESM.pdf [file 125_2021_5478_MOESM1_ESM.pdf]

## ESM Methods

### Study design and data sources

ICD & OPCS codes used for defining CVD

**Prior CVD ICD codes used to exclude people who have had an event in a period of 10 years prior to the study start date**

ICD10: I20, I21, I22, I23, I24, I25, I61, I63, I64, G45, I70.2, I70.8, I70.9, I73.9, E10.5, E11.5, E13.5, E14.5

ICD9: 410, 411, 412, 413, 414, 431, 433, 434, 435, 443.9, 440.2, 440.3, 440.4, 440.9, 250.7

**Study CVD codes used to determine an event during the study period**

ICD10: I20, I21, I22, I23, I24, I25, I61, I63, I64, G45, I70.2, I70.8, I70.9, I73.9, E10.5, E11.5, E13.5, E14.5

ICD9: 410, 411, 412, 413, 414, 431, 433, 434, 435, 443.9, 440.2, 440.3, 440.4, 440.9, 250.7

OPCS4: K40, K41, K42, K43, K44, K45, K46, K48, K49, K50, K75, L29, L30, L31.0, L31.1, L31.3, L31.4, L31.5, L31.6, L31.7, L31.8, L31.9, L33, L34, L35, X09.1, X09.2, X09.3, X09.4, X09.5

OPCS3: 304, 082.8, 871.2, 873

**CHD related death during the study period**

ICD10: I20, I21, I22, I23, I24, I25, I46

ICD9: 427.5, 410, 412, 413, 414

### Candidate covariates

Clinician assigned diabetes type in SCI-Diabetes was accepted unless contradicted by available data on age at diagnosis and prescription history. Those who were assigned type 1 were reassigned as type 2 if they had a contradictory drug history and age at diagnosis >40 years. A prescription history that contradicts type 1 diabetes was more than 1-year of non-metformin oral diabetes drug use or more than a 1-year interval from diagnosis to insulin. This rule reassigned 10.8% of type 1 diabetes as type 2. Those who were initially assigned as type 2 were reassigned to type 1 only if they have insulin from diagnosis and an age of onset below age 30 years (0.8% were reassigned). Smoking was categorised according to the categories in the electronic health record front end to SCI-Diabetes; never/current/ex or unknown. Albuminuria was defined based on urinary albumin concentration in urines collected at routine clinic visits and categorised as normo-, micro- or macroalbuminuric according to the albumin/creatinine ratio (ACR) falling in the intervals 0–3.39 mg/mmol, 3.39–33.9 mg/mmol, or above 33.9 mg/mmol, based on two out of three most recent consecutive measurements. Retinopathy was defined based on grading of most recent retinal image at screening and categorised as none; non referable which is mild background; referable or at clinic which is pre-proliferative or worse retinopathy or maculopathy or prior referral to eye clinic because of retinopathy. The Scottish Index of Multiple Deprivation (SIMD) ranks geographic areas by a single index capturing seven domains of deprivation and is summarised in quintiles. Here,

for those with diabetes postcode of residence obtained from the CHI database was assigned to the SIMD quintile it belonged and was used as a measure of socioeconomic status.

## Statistical methods

### *Model sensitivity checks*

We confirmed that using models with backward selection or using multivariable fractional polynomials (using the `mfp` package in R) did not improve the AIC.

### *Special considerations on evaluating predictive performance from survival models*

With a survival dataset reformatted as person-time intervals of fixed length, the predictive performance of the model can be evaluated by comparing “case” person-time intervals in which an event occurs with “noncase” person-time intervals in which no event occurs. The problem is that some of these person-time intervals are censored, either at the first event or at exit from other causes. Thus, the expected number of events in each person-time interval, calculated allowing for censoring at first event, does not rank individuals by risk. As Uno et al discuss [1], the classical C-statistic, which uses only the ranking of risk scores, cannot be used in this situation. Similar problems arise with calibration plots, as discussed by Crowson et al [2] and Austin et al [3].

The fundamental problem is that because person-time intervals of unequal length are not exchangeable, de Finetti’s theorem does not apply; we cannot represent the case-noncase observations on these intervals as a mixture of independent and identically-distributed Bernoulli variables conditional on the risk scores. If we ignore censoring and calculate the probability of an event before the end of a person-time interval of fixed length, the observations are exchangeable. This however inflates the total person-time of observation, so that the total expected events no longer equates to the total observed events; the “calibration in the large” cannot be evaluated.

Complicated methods have been proposed to overcome these problems [3] some of which for predictive performance have been implemented in the `SurvAUC` package in R (<https://cran.r-project.org/web/packages/survAUC/survAUC.pdf> accessed 06 Dec 2020). A much simpler approach is to reformat the dataset with many short person-time intervals. In the limit of infinitesimally short person-time intervals, the Bernoulli and Poisson likelihoods are equivalent and censoring within person-time intervals can be ignored. We can then use standard methods to evaluate the predictive performance and calibration of a binary classifier, as in a case-control study. Thus, for the purposes of assessing calibration and predictive performance both in the concatenated cross-validation test dataset in Scotland and in the Swedish dataset the one year person time intervals were subdivided into 28-day intervals as no further change in estimated calibration occurred beyond this (see <http://www.homepages.ed.ac.uk/pmckeigu/stats/survival.html> accessed 6 Dec 2020) for further theoretical underpinning of this approach and a worked example.

### *Re-calibration of the model in Sweden*

To re-calibrate the model for Sweden, the predicted rate was adjusted on the log scale as follows; If P is the average rate in one person year in the target population, and Q is the average rate in one person year using the model in the target population, the difference on the log scale gamma is calculated as  $\gamma = \log(P) - \log(Q)$ . For each individual in the Swedish dataset, the risk obtained from the model was then adjusted by transforming it to the log scale, adding gamma, and transforming it back to the risk scale.

## **ESM Results**

### **Scottish model implementation**

For a single individual the probability of an event within the next  $T$  years, assuming no censoring from other causes, is

$$1 - \prod_{t=1}^T (1 - \exp \mu_t)$$

where

$$\mu_t = \exp(\alpha + \mathbf{X}_t \boldsymbol{\beta})$$

where  $\alpha$  is the intercept parameter,  $\mathbf{X}_t$  is a matrix of covariates with one row for each of the  $T$  time intervals and  $\boldsymbol{\beta}$  is the vector of coefficients in the Poisson regression model. Covariates, intercept and coefficients are provided in ESM table 9.

## ESM references

1. Uno H, Cai T, Pencina MJ, D'Agostino RB et al. On the C-statistics for evaluating overall adequacy of risk prediction procedures with censored survival data. *Stat Med.* 2011 May 10;30(10):1105-17. doi: 10.1002/sim.4154. Epub 2011 Jan 13. PMID: 21484848; PMCID: PMC3079915.
2. Crowson CS, Atkinson EJ, Therneau TM. Assessing calibration of prognostic risk scores. *Stat Methods Med Res.* 2016 Aug;25(4):1692-706. doi: 10.1177/0962280213497434. Epub 2013 Jul 30. Erratum in: *Stat Methods Med Res.* 2017 Aug;26(4):1992-1993. PMID: 23907781; PMCID: PMC3933449.
3. Austin PC, Harrell FE Jr, van Klaveren D. Graphical calibration curves and the integrated calibration index (ICI) for survival models. *Stat Med.* 2020 Sep 20;39(21):2714-2742. doi: 10.1002/sim.8570. Epub 2020 Jun 16. PMID: 32548928; PMCID: PMC7497089.

ESM Table 2: Scottish dataset missingness

|                                                  | Missingness(%) |
|--------------------------------------------------|----------------|
| Age at entry (years)                             | 0.00           |
| Sex                                              | 0.00           |
| Diabetes duration (years)                        | 0.00           |
| Deprivation index                                | 9.64           |
| BMI (kg/m <sup>2</sup> )                         | 6.04           |
| eGFR (ml min <sup>-1</sup> 1.73m <sup>-2</sup> ) | 13.65          |
| Mean HbA <sub>1c</sub> (last 3 years)(mmol/mol)  | 4.34           |
| HbA <sub>1c</sub> (mmol/mol)                     | 5.26           |
| Systolic BP (mmHg)                               | 4.31           |
| Diastolic BP (mmHg)                              | 4.30           |
| Weight (kg)                                      | 4.43           |
| Height (meters)                                  | 6.06           |
| Total cholesterol (mmol/l)                       | 11.07          |
| HDL cholesterol (mmol/l)                         | 21.86          |
| Albuminuric grade                                | 35.88          |
| Retinopathy grading                              | 18.05          |
| Tobacco smoking                                  | 1.38           |
| Exercise                                         | 66.15          |
| Treated for hypertension                         | 0.00           |
| Treated for dyslipidaemia                        | 0.00           |
| Ever atrial fibrillation                         | 0.00           |

If there was no history of treatment for hypertension, or history of treatment of dyslipidaemia or history of atrial fibrillation, the variable was encoded as 0, so by definition there is zero missingness for continuous values

ESM Table 1: Scottish cohort characteristics at study entry

|                                                  | No CVD          | CVD              | P-Value | Total            |
|--------------------------------------------------|-----------------|------------------|---------|------------------|
| <b>Total included</b>                            | 24737(89.9%)    | 2790(10.1%)      |         | 27527            |
| Total Follow-up (years)                          | 185577(93.0)    | 13975(7.0)       |         | 199552           |
| <b>Sociodemographic</b>                          |                 |                  |         |                  |
| Sex                                              |                 |                  |         |                  |
| Male                                             | 14041(56.8)     | 1658(59.4)       |         | 15699(57.0)      |
| Female                                           | 10696(43.2)     | 1132(40.6)       | 0.004   | 11828(43.0)      |
| Age at entry (years)                             | 33(22,44)       | 49(41,59)        | <0.001  | 35(23,46)        |
| Diabetes duration (years)                        | 12(4,21)        | 24(15,34)        | <0.001  | 13(5,23)         |
| Age at diabetes diag (years)                     | 19(11,29)       | 25(15,34)        | <0.001  | 19(11,30)        |
| Follow up (years)                                | 10(5,10)        | 5(3,8)           | <0.001  | 10(4,10)         |
| Year diagnosed (year)                            | 1997(1987,2006) | 1984(1974,1993)  | <0.001  | 1996(1985,2005)  |
| Deprivation index                                |                 |                  |         |                  |
| Quintile 1 (most deprived)                       | 4620(18.7)      | 644(23.1)        | <0.001  | 5264(19.1)       |
| Quintile 2                                       | 4726(19.1)      | 610(21.9)        | 0.121   | 5336(19.4)       |
| Quintile 3                                       | 4534(18.3)      | 487(17.5)        | <0.001  | 5021(18.2)       |
| Quintile 4                                       | 4415(17.8)      | 394(14.1)        | <0.001  | 4809(17.5)       |
| Quintile 5 (least deprived)                      | 4214(17.0)      | 299(10.7)        | <0.001  | 4513(16.4)       |
| Unknown                                          | 2228(9.0)       | 356(12.8)        | <0.001  | 2584(9.4)        |
| <b>Other clinical measures</b>                   |                 |                  |         |                  |
| HbA <sub>1c</sub> (mmol/mol)                     | 72(61,85)       | 77(65,91)        | <0.001  | 72(61,86)        |
| HbA <sub>1c</sub> (%)                            | 8.69(7.73,9.93) | 9.20(8.10,10.48) | <0.001  | 8.74(7.73,10.02) |
| BMI (kg/m <sup>2</sup> )                         | 25(23,29)       | 27(24,30)        | <0.001  | 26(23,29)        |
| Height (meters)                                  | 1.71(1.64,1.78) | 1.70(1.62,1.77)  | <0.001  | 1.71(1.64,1.78)  |
| Weight (kg)                                      | 74(65,85)       | 78(67,90)        | <0.001  | 75(65,86)        |
| Systolic BP (mmHg)                               | 126(117,136)    | 134(123,144)     | <0.001  | 127(118,138)     |
| Diastolic BP (mmHg)                              | 75(69,80)       | 75(69,81)        | 0.411   | 75(69,80)        |
| Total cholesterol / HDL ratio (mmol/l)           | 3.18(2.64,3.85) | 3.20(2.59,3.96)  | <0.001  | 3.18(2.63,3.86)  |
| eGFR (ml min <sup>-1</sup> 1.73m <sup>-2</sup> ) | 101(86,116)     | 83(68,98)        | <0.001  | 99(84,115)       |
| Albuminuric status                               |                 |                  |         |                  |
| Normal                                           | 13095(52.9)     | 1215(43.5)       |         | 14310(52.0)      |
| Micro                                            | 2268(9.2)       | 491(17.6)        | <0.001  | 2759(10.0)       |
| Macro                                            | 311(1.3)        | 165(5.9)         | <0.001  | 476(1.7)         |
| Unknown                                          | 9063(36.6)      | 919(32.9)        | <0.001  | 9982(36.3)       |
| Retinopathy                                      |                 |                  |         |                  |
| None                                             | 9709(39.2)      | 454(16.3)        |         | 10163(36.9)      |
| Non referable                                    | 6776(27.4)      | 751(26.9)        | <0.001  | 7527(27.3)       |
| Referable / eye clinic                           | 3687(14.9)      | 1110(39.8)       | <0.001  | 4797(17.4)       |
| Unknown                                          | 4565(18.5)      | 475(17.0)        | <0.001  | 5040(18.3)       |
| Tobacco smoking status                           |                 |                  |         |                  |
| Never smoked                                     | 11778(47.6)     | 754(27.0)        |         | 12532(45.5)      |
| Ever smoked                                      | 12575(50.8)     | 2019(72.4)       | <0.001  | 14594(53.0)      |
| Unknown                                          | 384(1.6)        | 17(0.6)          | <0.001  | 401(1.5)         |
| <b>Comorbidities</b>                             |                 |                  |         |                  |
| No. with atrial fibrillation                     | 25(0.1)         | 20(0.7)          | <0.001  | 45(0.2)          |
| No. treated for dyslipidaemia                    | 7570(30.6)      | 1965(70.4)       | <0.001  | 9535(34.6)       |
| No. treated for hypertension                     | 6163(24.9)      | 1798(64.4)       | <0.001  | 7961(28.9)       |

Data are shown in N(%) for categorical values and median interquartile range for continuous values. Cases relate to CVD events that occurred during follow-up

ESM Table 3: Associations of each risk factor considered in the modelling process with incident first CVD event in the Scottish data adjusted for age, sex and diabetes duration

| Predictor                                        | IRR (95% CI)         | P-Value |
|--------------------------------------------------|----------------------|---------|
| Age at entry (years)                             | 1.163 (1.146, 1.180) | <0.001  |
| Current age (years)                              | 1.046 (1.043, 1.050) | <0.001  |
| Year diagnosed (year)                            | 0.942 (0.908, 0.978) | 0.002   |
| Sex                                              |                      |         |
| Male                                             | 1 (reference)        |         |
| Female                                           | 0.831 (0.770, 0.896) | <0.001  |
| Diabetes duration (years at entry)               | 1.023 (1.019, 1.026) | <0.001  |
| Deprivation index                                |                      |         |
| Quintile 1 (most deprived)                       | 1 (reference)        |         |
| Quintile 2                                       | 0.825 (0.739, 0.919) | 0.001   |
| Quintile 3                                       | 0.623 (0.554, 0.700) | <0.001  |
| Quintile 4                                       | 0.524 (0.463, 0.593) | <0.001  |
| Quintile 5 (least deprived)                      | 0.389 (0.340, 0.445) | <0.001  |
| HbA <sub>1c</sub> (mmol/mol)                     | 1.030 (1.028, 1.032) | <0.001  |
| Mean HbA <sub>1c</sub> (last 3 years)(mmol/mol)  | 1.031 (1.029, 1.033) | <0.001  |
| BMI (kg/m <sup>2</sup> )                         | 1.015 (1.008, 1.023) | <0.001  |
| Height (meters)                                  | 0.147 (0.086, 0.253) | <0.001  |
| Weight (kg)                                      | 1.001 (0.998, 1.004) | 0.429   |
| Systolic BP (mmHg)                               | 1.007 (1.004, 1.009) | <0.001  |
| Diastolic BP (mmHg)                              | 1.006 (1.002, 1.010) | 0.005   |
| Total cholesterol / HDL ratio (mmol/l)           | 1.049 (1.041, 1.056) | <0.001  |
| eGFR (ml min <sup>-1</sup> 1.73m <sup>-2</sup> ) | 0.988 (0.985, 0.990) | <0.001  |
| Albuminuric grade                                |                      |         |
| Normal                                           | 1 (reference)        |         |
| Micro                                            | 2.118 (1.917, 2.339) | <0.001  |
| Macro                                            | 4.978 (4.274, 5.797) | <0.001  |
| Retinopathy grading                              |                      |         |
| None                                             | 1 (reference)        |         |
| Non referable                                    | 1.203 (1.074, 1.347) | 0.001   |
| Referable or eye clinic                          | 2.182 (1.956, 2.435) | <0.001  |
| Tobacco smoking                                  |                      |         |
| Never smoked                                     | 1 (reference)        |         |
| Ever smoked                                      | 1.746 (1.605, 1.899) | <0.001  |
| Treated for hypertension                         | 1.957 (1.794, 2.135) | <0.001  |
| Treated for dyslipidaemia                        | 1.673 (1.525, 1.836) | <0.001  |
| Ever atrial fibrillation                         | 2.465 (1.585, 3.835) | <0.001  |

ESM Table 4: Swedish cohort characteristics at study entry

|                                                  | No CVD           | CVD             | P-Value | Total            |
|--------------------------------------------------|------------------|-----------------|---------|------------------|
| <b>Total included</b>                            | 29921(90.17)     | 3262(9.83)      |         | 33183            |
| Total Follow-up (years)                          | 237649(94)       | 15548(6)        |         | 253197           |
| <b>Sociodemographic</b>                          |                  |                 |         |                  |
| Sex                                              |                  |                 |         |                  |
| Male                                             | 16319(54.54)     | 1801(55.21)     |         | 18120(54.61)     |
| Female                                           | 13602(45.46)     | 1461(44.79)     | 0.681   | 15063(45.39)     |
| Age at study entry (years)                       | 30.0(21.5,41.1)  | 51.9(42.7,60.1) | <0.001  | 31.9(22.2,44.3)  |
| Diabetes duration (years)                        | 15.4(7.6,25.9)   | 35.7(26.3,45.0) | <0.001  | 16.9(8.4,28.8)   |
| Age at diag (years)                              | 14.4(9.2,21.5)   | 15.2(9.6,22.9)  | 0.086   | 14.4(9.2,21.7)   |
| Follow up (years)                                | 9.0(5.1,11.0)    | 4.4(2.0,7.3)    | <0.001  | 8.6(4.5,10.9)    |
| Year diagnosed (year)                            | 1990(1978,1999)  | 1968(1958,1977) | <0.001  | 1988(1975,1998)  |
| Deprivation index                                |                  |                 |         |                  |
| Quantile 1 (most deprived)                       | 6695(22.38)      | 266(8.15)       |         | 6961(20.98)      |
| Quantile 2                                       | 5565(18.60)      | 846(25.94)      | <0.001  | 6411(19.32)      |
| Quantile 3                                       | 5583(18.66)      | 824(25.26)      | <0.001  | 6407(19.31)      |
| Quantile 4                                       | 5989(20.02)      | 701(21.49)      | <0.001  | 6690(20.16)      |
| Quantile 5 (least deprived)                      | 6089(20.35)      | 625(19.16)      | <0.001  | 6714(20.23)      |
| <b>Other clinical measures</b>                   |                  |                 |         |                  |
| HbA <sub>1c</sub> (mmol/mol)                     | 64(54,73)        | 68(59,78)       | <0.001  | 64(55,74)        |
| HbA <sub>1c</sub> (%)                            | 8.0 (7.1, 8.8)   | 8.4 (7.5, 9.2)  | <0.001  | 8.0 (7.2, 8.9)   |
| BMI (kg/m <sup>2</sup> )                         | 24.5(22.3,27.2)  | 25.1(22.6,27.9) | <0.001  | 24.6(22.3,27.3)  |
| Height(M)                                        | 1.73(1.66,1.80)  | 1.72(1.64,1.79) | <0.001  | 1.73(1.66,1.80)  |
| Systolic BP (mmHg)                               | 120(114,130)     | 140(125,150)    | <0.001  | 122(115,135)     |
| Diastolic BP (mmHg)                              | 72(68,80)        | 75(70,80)       | <0.001  | 72(69,80)        |
| Total Cholesterol / HDL ratio (mmol/l)           | 3.1(2.5,3.7)     | 3.2(2.6,4.1)    | <0.001  | 3.1(2.5,3.8)     |
| eGFR (ml min <sup>-1</sup> 1.73m <sup>-2</sup> ) | 95.1(78.0,113.9) | 74.3(56.1,92.3) | <0.001  | 93.2(75.7,112.4) |
| Albuminuric Status                               |                  |                 |         |                  |
| Normo                                            | 24963(83.43)     | 1771(54.29)     |         | 26734(80.57)     |
| Micro                                            | 3284(10.98)      | 745(22.84)      | <0.001  | 4029(12.14)      |
| Macro                                            | 1674(5.59)       | 746(22.87)      | <0.001  | 2420(7.29)       |
| Retinopathy Status                               |                  |                 |         |                  |
| None                                             | 16182(54.08)     | 843(25.84)      |         | 17025(51.31)     |
| Retinopathy                                      | 13739(45.92)     | 2419(74.16)     | <0.001  | 16158(48.69)     |
| Tobacco smoking status                           |                  |                 |         |                  |
| Ever Smokers                                     | 3555(11.88)      | 620(19.01)      | <0.001  | 4175(12.58)      |
| <b>Comorbidities</b>                             |                  |                 |         |                  |
| No. with atrial fibrillation                     | 30(0.10)         | 15(0.46)        | <0.001  | 45(0.14)         |
| No. prescribed statins                           | 3049(10.19)      | 1124(34.46)     | <0.001  | 4173(12.58)      |
| No. prescribed anti-hypertensive                 | 5192(17.35)      | 1867(57.23)     | <0.001  | 7059(21.27)      |

Data are shown in N(%) for categorical values and median interquartile range for continuous values. Cases relate to CVD events that occurred during follow-up



ESM Table 5 Swedish dataset missingness

|                                                  | Missingness(%) |
|--------------------------------------------------|----------------|
| Age at entry (years)                             | 0.00           |
| Sex                                              | 0.00           |
| Diabetes duration (years)                        | 0.00           |
| Deprivation index                                | 0.10           |
| BMI (kg/m <sup>2</sup> )                         | 13.60          |
| eGFR (ml min <sup>-1</sup> 1.73m <sup>-2</sup> ) | 25.90          |
| HbA <sub>1c</sub> (mmol/mol)                     | 4.40           |
| Systolic BP (mmHg)                               | 6.70           |
| Diastolic BP (mmHg)                              | 6.70           |
| Weight (kg)                                      | 8.30           |
| Height (meters)                                  | 11.00          |
| Total cholesterol (mmol/l)                       | 32.00          |
| HDL cholesterol (mmol/l)                         | 36.70          |
| Albuminuric grade                                | 17.60          |
| Retinopathy grading                              | 61.10          |
| Tobacco smoking                                  | 0.00           |
| Treated for hypertension                         | 0.00           |
| Treated for dyslipidaemia                        | 0.00           |
| Ever atrial fibrillation                         | 0.00           |

If there was no history of treatment for hypertension, or history of treatment of dyslipidaemia or history of atrial fibrillation, the variable was encoded as 0, so by definition there is zero missingness median interquartile range for continuous values

ESM Table 6: Associations of each risk factor considered in the modelling process with incident first CVD event in the Swedish data adjusted for age, sex and diabetes duration

| Predictor                                        | IRR (95% CI)         | P-Value |
|--------------------------------------------------|----------------------|---------|
| Age at study entry (years)                       | 1.064 (1.050, 1.078) | <0.001  |
| Current age (years)                              | 1.054 (1.048, 1.060) | <0.001  |
| Year diagnosed (year)                            | 0.933 (0.921, 0.945) | <0.001  |
| Sex                                              |                      |         |
| Male                                             | 1 (reference)        |         |
| Female                                           | 0.812 (0.747, 0.883) | <0.001  |
| Diabetes duration (years at entry)               | 1.029 (1.024, 1.035) | <0.001  |
| Deprivation index                                |                      |         |
| Quintile 1 (most deprived)                       |                      |         |
| Quintile 2                                       | 1.377 (1.167, 1.625) | <0.001  |
| Quintile 3                                       | 1.283 (1.088, 1.513) | 0.003   |
| Quintile 4                                       | 0.986 (0.832, 1.169) | 0.873   |
| Quintile 5 (least deprived)                      | 0.774 (0.650, 0.923) | 0.004   |
| HbA <sub>1c</sub> (mmol/mol)                     | 1.035 (1.032, 1.038) | <0.001  |
| BMI (kg/m <sup>2</sup> )                         | 1.026 (1.015, 1.036) | <0.001  |
| Height(M)                                        | 0.219 (0.118, 0.407) | <0.001  |
| Weight (kg)                                      | 1.004 (1.001, 1.008) | 0.012   |
| Systolic BP (mmHg)                               | 1.017 (1.015, 1.020) | <0.001  |
| Diastolic BP (mmHg)                              | 1.020 (1.016, 1.025) | <0.001  |
| Total Cholesterol / HDL ratio (mmol/l)           | 1.217 (1.205, 1.229) | <0.001  |
| eGFR (ml min <sup>-1</sup> 1.73m <sup>-2</sup> ) | 0.990 (0.989, 0.992) | <0.001  |
| Almuninuric grade                                |                      |         |
| Normal                                           | 1 (reference)        |         |
| Micro                                            | 1.908 (1.719, 2.118) | <0.001  |
| Macro                                            | 3.768 (3.400, 4.176) | <0.001  |
| Retinopathy                                      |                      |         |
| None                                             | 1 (reference)        |         |
| Mild/Moderate/Refereable                         | 1.361 (1.233, 1.503) | <0.001  |
| Tobacco smoking                                  |                      |         |
| Never smoked                                     | 1 (reference)        |         |
| Ever Smoker                                      | 1.856 (1.669, 2.064) | <0.001  |
| Treated for hypertension                         | 1.974 (1.699, 2.295) | <0.001  |
| Treated for dyslipidaemia                        | 1.866 (1.545, 2.253) | <0.001  |
| Ever atrial fibrillation                         | 1.240 (0.665, 2.314) | 0.499   |

ESM Table 7: Predictive performance of the QRISK3 and the Steno CVD Type 1 Engine in the Scottish population

| Model  | C-Statistic (95% CI) | Observed events | Events predicted | Ratio |
|--------|----------------------|-----------------|------------------|-------|
| Steno  | 0.82 (0.81 ,0.83)    | 2790            | 3557             | 1.27  |
| QRISK3 | 0.75 (0.74 ,0.76)    | 2654            | 1917             | 0.72  |

Observed events are lower for QRISK, as the model has an age limit of 25-84

ESM Table 8: Percentage eligible for statin therapy under NICE guideline and percentage with a 10 year risk of at least 5% and at least 10%

| Age group | Eligible for Statin | CVD Risk $\geq$ 5% | CVD Risk $\geq$ 10% |
|-----------|---------------------|--------------------|---------------------|
| 20-24     | 81.35               | 4.29               | 1.19                |
| 25-29     | 89.13               | 10.91              | 3.49                |
| 30-34     | 92.47               | 24.55              | 9.11                |
| 35-39     | 95.14               | 47.03              | 20.85               |
| 40-44     | 100.00              | 69.92              | 37.10               |
| 45-49     | 100.00              | 85.13              | 56.80               |
| 50-54     | 100.00              | 95.15              | 75.23               |
| 55-59     | 100.00              | 98.56              | 85.55               |
| 60-64     | 100.00              | 99.50              | 95.23               |
| 65-99     | 100.00              | 100.00             | 98.65               |
| 70-74     | 100.00              | 100.00             | 100.00              |
| 75-79     | 100.00              | 100.00             | 100.00              |
| 80-84     | 100.00              | 100.00             | 100.00              |
| 85-89     | 100.00              | 100.00             | 100.00              |

Risks were increased by 25% for individuals receiving statin therapy at study entry

ESM Table 9: Predictor variables and coefficients for risk prediction of CVD in type 1 diabetes excluding deprivation index

| Predictor                                            | Coefficient              |
|------------------------------------------------------|--------------------------|
| (Intercept)                                          | -3.64810112              |
| Current age (years)                                  | 0.3271865                |
| Current age <sup>2</sup> (years <sup>2</sup> )       | -0.00403131              |
| Current age <sup>3</sup> (years <sup>3</sup> )       | 2.08 x 10 <sup>-05</sup> |
| Sex male                                             | 0.00000000               |
| Sex female                                           | -0.77934644              |
| Diabetes duration (years)                            | 0.01943773               |
| HbA <sub>1c</sub> (mmol/mol)                         | 0.01143295               |
| Mean HbA <sub>1c</sub> (last 3 years)(mmol/mol)      | 0.02781042               |
| log BMI (kg/m <sup>2</sup> )                         | -2.01243842              |
| Height (meters)                                      | -3.18108541              |
| Weight (kg)                                          | 0.00741941               |
| Systolic BP (mmHg)                                   | 0.00381897               |
| log Total cholesterol / HDL ratio (mmol/l)           | 0.49215468               |
| log eGFR (ml min <sup>-1</sup> 1.73m <sup>-2</sup> ) | -0.32126549              |
| Albuminuric grade normal                             | 0.00000000               |
| Albuminuric grade micro                              | 0.36310623               |
| Albuminuric grade macro                              | 0.94826311               |
| Retinopathy none                                     | 0.00000000               |
| Retinopathy non referable                            | 0.10606169               |
| Retinopathy referable or eye clinic                  | 0.41224979               |
| Never smoked                                         | 0.00000000               |
| Tobacco smoking                                      | 0.38809494               |
| Treated for hypertension                             | 0.31887555               |
| Treated for dyslipidaemia                            | 0.14728126               |
| Ever atrial fibrillation                             | 0.70356665               |
| Interaction: Sex * log Total cholesterol / HDL ratio | 0.48736885               |
| Interaction: Age * Weight                            | 0.0002678                |
| Interaction: Age * 3 year mean HbA <sub>1c</sub>     | -0.00028851              |

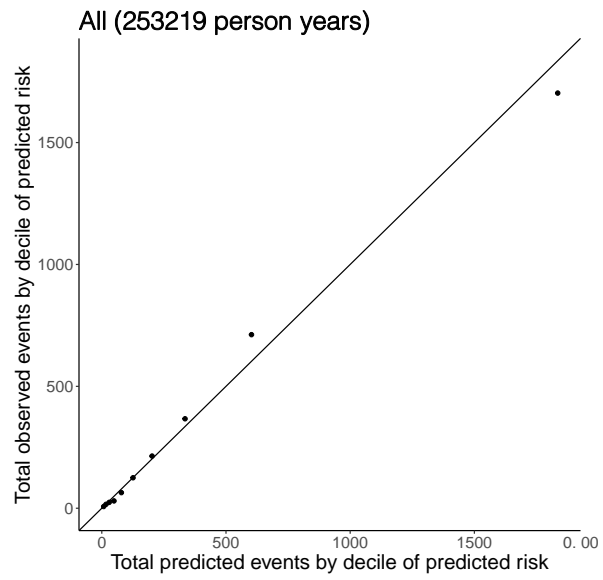

ESM Fig 1: Calibration of model in the Swedish validation dataset
